# Supplementary material for: Surveillance of avian influenza viruses in South Korea between 2012 and 2014
Source: Virol J. 2017 Mar 14;14:54. doi: 10.1186/s12985-017-0711-y (PMC5351195; doi:10.1186/s12985-017-0711-y)
Supplement: Additional file 1: Table S1. — National active surveillace plan for avian influenza in 2014 in South Korea. (XLSX 14 kb) [file 12985_2017_711_MOESM1_ESM.xlsx]

## Sheet: Sheet1
Supplementary table 1. National active surveillace plan for avian influenza in 2014 in South Korea
Category	Target	No. of farms(house)*	No. of samples	Period
Domestic duck	Breeder duck	105(609)	146160	Ag(quarterly)
				Ab(quarterly)
	Broiler duck	781(2,506)	20048	Ag(quarterly)
Wild bird	Wild bird(feces, dead bird)	-	7568	Ag(monthly)
	Wild bird(captured bird)	-	1000	Ag(monthly)
LBM	Live bird market(LBM)	330	2790	Ag(semiannually)
	Supplier for LBM(farm, dealer)	-	640	LBM positive cases
Minor poultry	Pheasant, Quail, Goose, Turkey, Ostrich et al	158(227)	1816	Ag(semiannually) Ab(semiannually)
Domestic chicken	Chicken farms for H5/H7 LPAI	904(5164)	51540	Ab(annually)
Feed	Imported raw materials	-	-	HPAI outbreak
* The AI surveillance plan were coordinated annually.
The targeted numbers were those of total duck farms and live bird markets.
The targeted numbers of chicken farms were 904 farms among 4,055 chicken farms.
** The farm sampling was taken from 20-birds in each flock house.

## Sheet: Sheet2
Figure. Molecular Phylogenetic analysis by Maximum Likelihood method The evolutionary history was inferred by using the Maximum Likelihood method based on the General Time Reversible model [1]. The tree with the highest log likelihood (-11181.3945) is shown. The percentage of trees in which the associated taxa clustered together is shown next to the branches. Initial tree(s) for the heuristic sea…
